# Supplementary material for: Afrostyrax lepidophyllus Mildbr. and Monodora myristica (Gaertn.) Dunal Extracts Decrease Doxorubicin Cytotoxicity on H9c2 Cardiomyoblasts
Source: Hindawi journal article supplement (doi:10.1155/2021/8858165), 2021-02-22
Supplement: f1 [file 8858165.f1.pdf]

***Afrostryax lepidophyllus* Mildbr. and *Monodora myristica* (Gaertn.) Dunal Extracts  
Decrease Doxorubicin Cytotoxicity on H9c2 Cardiomyoblasts**

(Moukette et al.)

**Supplementary material**

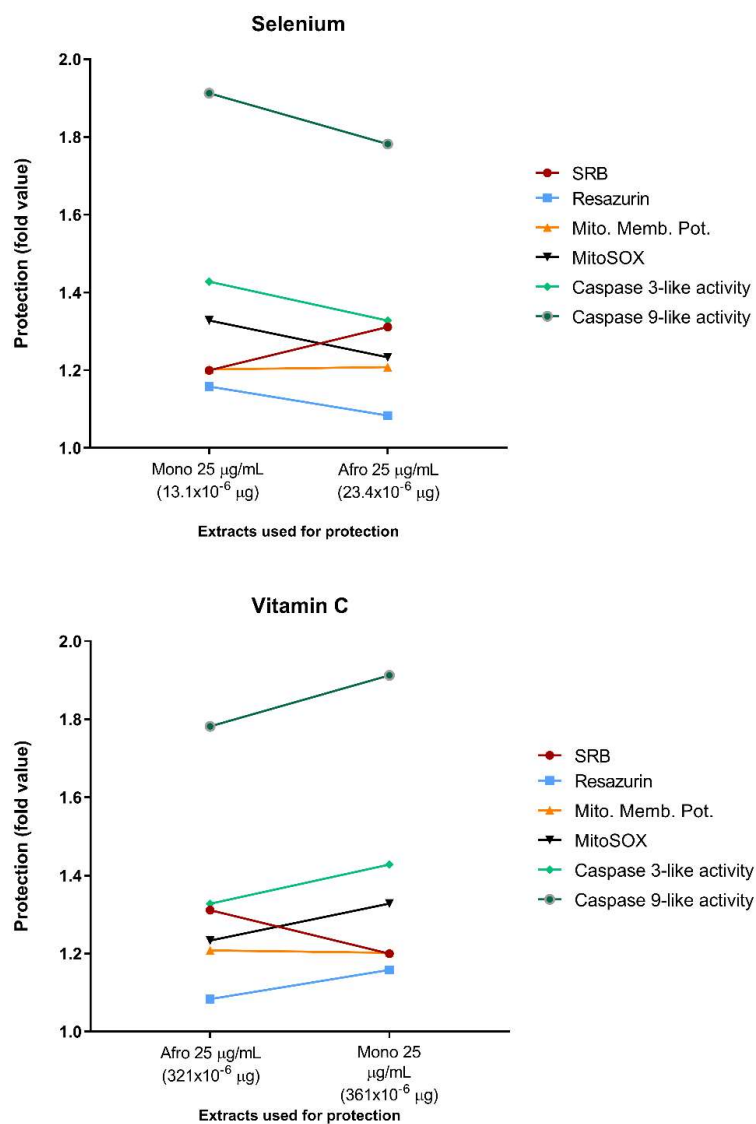

Supplementary Figure 1. Protection (fold value) of H9c2 against Dox comparison of the extracts across the various assays, highlighting the selenium and vitamin C contents of each extract.
